# Supplementary material for: RAGE as a Novel Biomarker for Prostate Cancer: A Systematic Review and Meta-Analysis
Source: MDPI journal article supplement (doi:10.3390/cancers15194889), 2023-10-09
Supplement: s1 [file s1]

**Supplemental Table S1.** Quality assessment of included clinical studies.

| Source                 | Selection               |                             |                        |                         | Comparability <sup>5</sup> | Exposure                   |                     |                        | Total <sup>9</sup> |
|------------------------|-------------------------|-----------------------------|------------------------|-------------------------|----------------------------|----------------------------|---------------------|------------------------|--------------------|
| Author, Year           | Definition <sup>1</sup> | Representative <sup>2</sup> | Selection <sup>3</sup> | Definition <sup>4</sup> |                            | Ascertainment <sup>6</sup> | Method <sup>7</sup> | Technique <sup>8</sup> |                    |
| Aboushousha, 2019 [36] | ★                       | ★                           | ★                      | 0                       | 0                          | ★                          | 0                   | ★                      | 5                  |
| Akkus, 2020 [37]       | ★                       | ★                           | ★                      | 0                       | ★                          | ★                          | ★                   | ★                      | 7                  |
| Foster, 2014 [38]      | ★                       | 0                           | 0                      | 0                       | 0                          | ★                          | 0                   | ★                      | 3                  |
| Hemani, 2005 [39]      | ★                       | ★                           | ★                      | ★                       | 0                          | ★                          | ★                   | ★                      | 7                  |
| Ishiguro, 2005 [40]    | ★                       | ★                           | ★                      | ★                       | ★                          | ★                          | ★                   | ★                      | 8                  |
| Konopka, 2020 [24]     | ★                       | ★                           | 0                      | 0                       | ★                          | ★                          | ★                   | ★                      | 6                  |
| Kuniyasu, 2003 [41]    | ★                       | ★                           | 0                      | 0                       | ★                          | ★                          | 0                   | ★                      | 5                  |
| Ravenna, 2009 [42]     | ★                       | ★                           | ★                      | 0                       | 0                          | ★                          | 0                   | ★                      | 5                  |
| Zhao, 2014 [43]        | ★                       | ★                           | ★                      | 0                       | 0                          | ★                          | ★                   | ★                      | 6                  |

<sup>1</sup>Indicates that cases are independently validated for prostate cancer (PCa) by a trained histopathologist (0, 1 star); <sup>2</sup>cases are from a representative population or drawn from the same community (0, 1); <sup>3</sup>control of non-PCa prostate tissue (prostatitis, benign prostate hyperplasia, or healthy prostate) was included (0, 1); <sup>4</sup>control of normal prostate was included (0, 1); <sup>5</sup>specified as non-metastatic vs. metastatic or androgen-sensitive vs. androgen-insensitive PCa (0, 1, 2); <sup>6</sup>PCa samples were attained from medical records (0, 1); <sup>7</sup>collection method of PCa tissue was included (0, 1); <sup>8</sup>approved identification technique was used to measure RAGE expression (0, 1); <sup>9</sup>total: minimum equals 1 star; maximum equals 9 stars.
