# Supplementary material for: RAGE as a Novel Biomarker for Prostate Cancer: A Systematic Review and Meta-Analysis
Source: MDPI journal article supplement (doi:10.3390/cancers15194889), 2023-10-09
Supplement: s1 [file s1]

**Supplementary Table S2.** Quality assessment of included cell culture studies (adapted from WCRF/UoB recommendations) [28].

| Author, Year                | Source <sup>1</sup> | Experimental Conditions         |                         |                                |                                |                                  | Selective Reporting <sup>7</sup> | Statistics <sup>8</sup> | Total |
|-----------------------------|---------------------|---------------------------------|-------------------------|--------------------------------|--------------------------------|----------------------------------|----------------------------------|-------------------------|-------|
|                             |                     | Culture Conditions <sup>2</sup> | Replicates <sup>3</sup> | Positive Controls <sup>4</sup> | Negative Controls <sup>5</sup> | Multiple Cell Lines <sup>6</sup> |                                  |                         |       |
| Bao et al., 2015 [44]       | 1                   | 1                               | 1                       | 1                              | 1                              | 0                                | 1                                | 1                       | 7     |
| Elangovan et al., 2011 [45] | 1                   | 1                               | 1                       | 1                              | 1                              | 1                                | 1                                | 1                       | 8     |
| Ishiguro et al., 2005 [40]  | 1                   | 1                               | 1                       | 0                              | 1                              | 0                                | 1                                | 1                       | 6     |
| Siddique et al., 2013 [46]  | 1                   | 1                               | 1                       | 1                              | 1                              | 0                                | 1                                | 1                       | 7     |
| Wu et al., 2021 [47]        | 1                   | 1                               | 1                       | 0                              | 1                              | 1                                | 1                                | 1                       | 7     |
| Zhang et al., 2018 [21]     | 1                   | 1                               | 1                       | 1                              | 1                              | 0                                | 0                                | 0                       | 5     |

Studies are given a score of 0 or 1 for each of the following parameters (a score of 0 was given for a lack of criteria fulfillment or failure to report): <sup>1</sup>cell lines are independently validated; <sup>2</sup>comparable culture conditions to other studies; <sup>3</sup>experiment performed in replicate(s); <sup>4</sup>appropriate positive controls included; <sup>5</sup>appropriate negative controls included; <sup>6</sup>more than one cell line used; <sup>7</sup>all experimental results are reported (a score of 0 was given for missing statistical data); <sup>8</sup>appropriate statistical test used.
