# Supplementary figures and images for: RAGE as a Novel Biomarker for Prostate Cancer: A Systematic Review and Meta-Analysis
Source: MDPI journal article supplement (doi:10.3390/cancers15194889), 2023-10-09

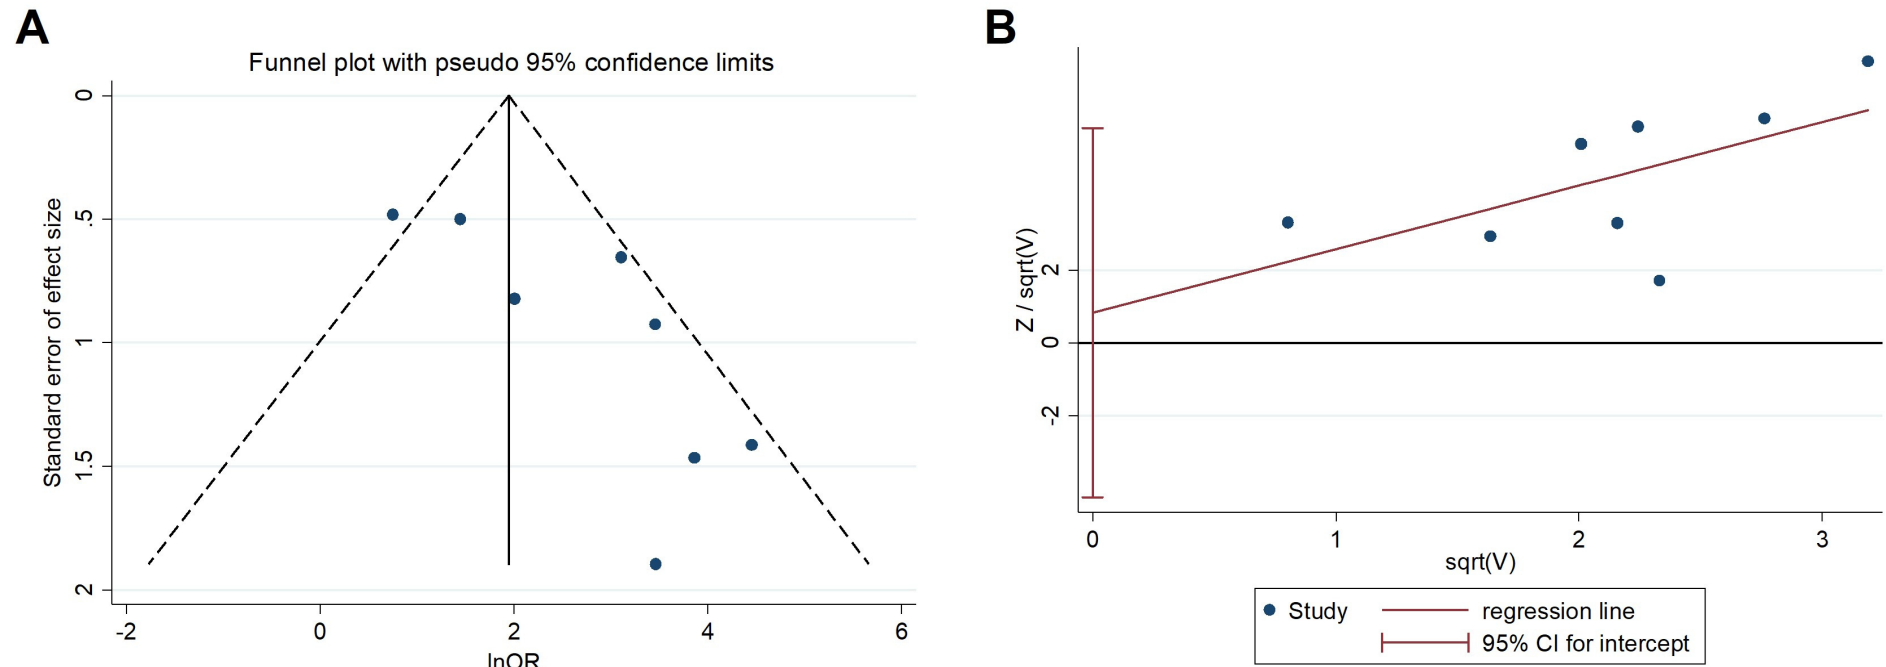

**Figure S1:** (A,B) Results of tests of bias.

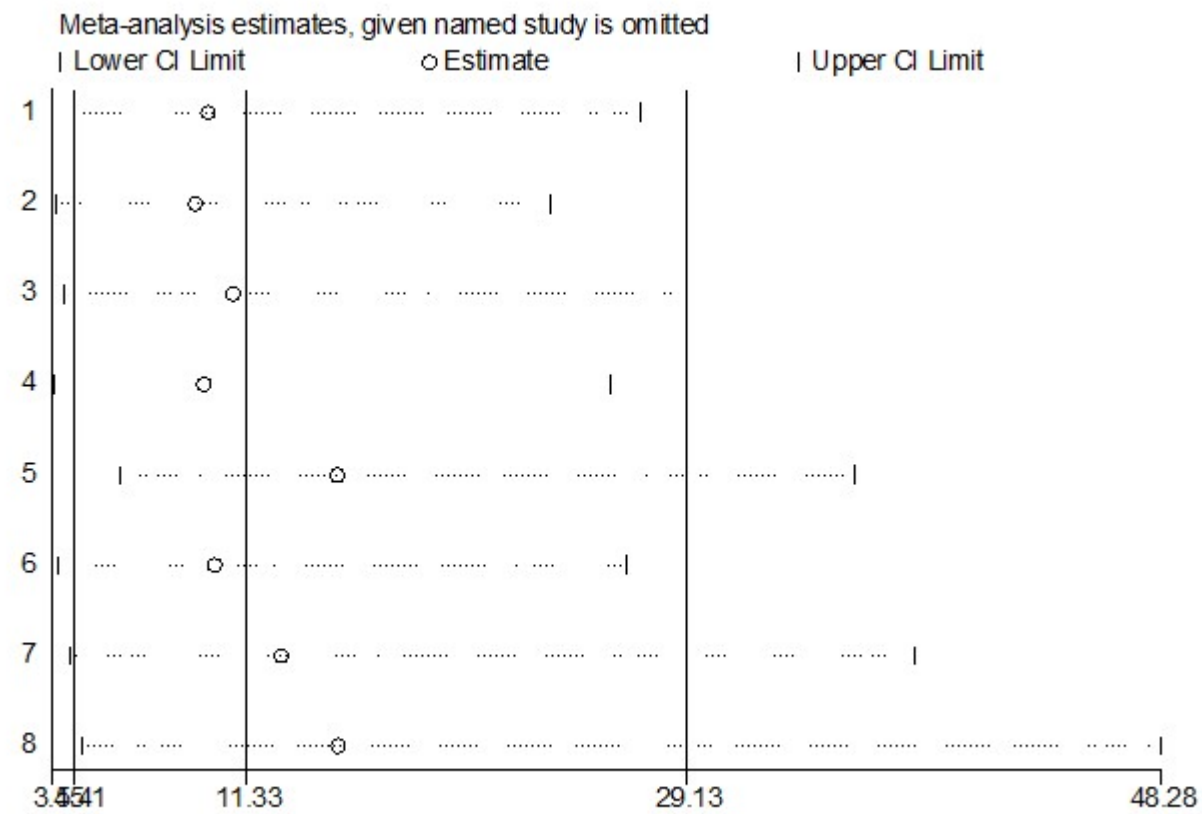

**Figure S2:** Leave-one-out meta-analysis.

Supplement: s1 [file s1]
